# Supplementary material
Source: PubMed Central journal article supplement (PMC6491052)
Supplement: AnnalsATS.201807-443OC_adegunsoye_data_supplement.pdf [file AnnalsATS.201807-443OC_adegunsoye_data_supplement.pdf]

## **Online Data Supplement**

### **CT Honeycombing Identifies a Progressive Fibrotic Phenotype with Increased Mortality Across Diverse Interstitial Lung Diseases**

Ayodeji Adegunsoye, MD, MS; Justin M. Oldham, MD, MS; Shashi K. Bellam, MD; Steven Montner, MD; Matthew M. Churpek, MD, MPH, PhD; Imre Noth, MD; Rekha Vij, MD; Mary E. Streck, MD; Jonathan H. Chung, MD

**Table E1.** Summary of CT scanners, image acquisition and reconstruction techniques used for assessment of CT Honeycombing

| CT machine                                                                                                                                         | Image Acquisition                                                                                                                                                                                                                    | Reconstruction protocols                                                                                                                                                                                                                                                                                                                                                                                                                                                                                                                       |
|----------------------------------------------------------------------------------------------------------------------------------------------------|--------------------------------------------------------------------------------------------------------------------------------------------------------------------------------------------------------------------------------------|------------------------------------------------------------------------------------------------------------------------------------------------------------------------------------------------------------------------------------------------------------------------------------------------------------------------------------------------------------------------------------------------------------------------------------------------------------------------------------------------------------------------------------------------|
| <b>University of Chicago</b>                                                                                                                       |                                                                                                                                                                                                                                      |                                                                                                                                                                                                                                                                                                                                                                                                                                                                                                                                                |
| Philips Brilliance 16 and 64-slice scanners<br>Philips Brilliance iCT 256-slice scanners<br>(Philips Medical System, Cleveland Inc, United States) | Supine helical CT acquisition was performed during end-inspiration at 120 kVp, 220 mAs. End-expiratory phase helical CT images (120 kVp, 60 mA) and end-inspiration 1 mm prone series (axial 1.2mm thick x 10mm) were also obtained. | Inspiratory supine: CT images were reconstructed using a 512 x 512-pixel image matrix. Axial images were reconstructed contiguously at 1 mm and 3 mm slice thickness using a lung reconstruction algorithm. Coronal and sagittal images were created at 2.5 mm thickness.<br>Expiratory: 3 mm axial contiguous reconstruction<br>Prone: Axial 1.2mm thick x 10mm                                                                                                                                                                               |
| <b>Evanston Hospital</b>                                                                                                                           |                                                                                                                                                                                                                                      |                                                                                                                                                                                                                                                                                                                                                                                                                                                                                                                                                |
| SIEMENS Somatom Definition Flash 128 Slices (Siemens Healthcare GmbH)                                                                              | Unenhanced Scan<br>Scan: Spiral<br>CAREkV: 120kV<br>CAREDose4D: 150 Qual Ref mAs<br>Detector Configuration: 128 x 0.6 mm<br>Pitch Factor: 0.6<br>Rotation Time: 0.5 sec                                                              | Recon 1 - Kernel: I41f, Plane: Axial, Slice Thickness: 5 mm Slice Interval: 5 mm IR: SAFIRE 1<br>Recon 2 - Kernel: I41f, Plane: Coronal, Slice Thickness: 4 mm Slice Interval: 4 mm IR: SAFIRE 1<br>Recon 3 - Kernel: I41f, Plane: Sagittal, Slice Thickness: 4 mm Slice Interval: 4 mm IR: SAFIRE 1<br>Recon 4 - Kernel: I70f, Plane: Axial, Slice Thickness: 2 mm Slice Interval: 2 mm IR: SAFIRE 1<br>Recon 5 - Kernel: I70f, Plane: Axial MIP Slice Thickness:8 mm Slice Interval: 4 mm IR: SAFIRE 1                                       |
| SIEMENS Somatom Definition AS 64 Slices (Siemens Healthcare GmbH)                                                                                  | Unenhanced Scan<br>Scan: Spiral<br>CAREkV: 120kV<br>CAREDose4D: 180 Qual Ref mAs<br>Detector Configuration: 64 x 0.6 mm<br>Pitch Factor: 0.7<br>Rotation Time: 0.5 sec                                                               | Recon 1 - Kernel: B31f, Plane: Axial, Slice Thickness: 5 mm Slice Interval: 5 mm IR: NA<br>Recon 2 - Kernel: B31f, Plane: Coronal, Slice Thickness: 4 mm Slice Interval: 4 mm IR: NA<br>Recon 3 - Kernel: B31f, Plane: Sagittal, Slice Thickness: 4 mm Slice Interval: 4 mm IR: NA<br>Recon 4 - Kernel: B75f, Plane: Axial, Slice Thickness: 2 mm Slice Interval: 2 mm IR: NA<br>Recon 5 - Kernel: B75f, Plane: Axial MIP Slice Thickness:8 mm Slice Interval: 4 mm IR: NA                                                                     |
| GE LightSpeed VCT 64 Slices (GE Healthcare)                                                                                                        | Unenhanced Scan<br>Scan: Helical<br>kV: 120kV<br>Auto mA: 100 - 500 mA Range<br>Ref Noise Index: 12<br>Detector Configuration: 64 x 0.625 mm<br>Pitch Factor: 0.984<br>Rotation Time: 0.5 sec                                        | Recon 1 - Algorithm: Standard Plus, Plane: Axial, Slice Thickness: 5 mm Slice Interval: 5 mm IR: No<br>Recon 2 - Algorithm: Lung, Full, Plane: Axial, Slice Thickness: 2.5 mm Slice Interval: 2.5 mm IR: No<br>Recon 3 - Algorithm: Standard, Plus, Plane: Axial, Slice Thickness: 0.625 mm Slice Interval: 0.625 mm IR: No<br>Recon 4 - Algorithm: Standard Plus, Plane: Coronal, Slice Thickness: 4 mm Slice Interval: 4 mm IR: No<br>Recon 5 - Algorithm: Standard Plus, Plane: Sagittal, Slice Thickness: 4 mm Slice Interval: 4 mm IR: No |
| <b>Glenbrook Hospital</b>                                                                                                                          |                                                                                                                                                                                                                                      |                                                                                                                                                                                                                                                                                                                                                                                                                                                                                                                                                |
| SIEMENS Somatom Definition AS 64 Slices (Siemens Healthcare GmbH)                                                                                  | Unenhanced Scan<br>Scan: Spiral<br>CAREkV: 120kV<br>CAREDose4D: 180 Qual Ref mAs<br>Detector Configuration: 64 x 0.6 mm<br>Pitch Factor: 0.7<br>Rotation Time: 0.5 sec                                                               | Recon 1 - Kernel: I41f, Plane: Axial, Slice Thickness: 5 mm Slice Interval: 5 mm IR: SAFIRE 1<br>Recon 2 - Kernel: I41f, Plane: Coronal, Slice Thickness: 4 mm Slice Interval: 4 mm IR: SAFIRE 1<br>Recon 3 - Kernel: I41f, Plane: Sagittal, Slice Thickness: 4 mm Slice Interval: 4 mm IR: SAFIRE 1<br>Recon 4 - Kernel: I70f, Plane: Axial, Slice Thickness: 2 mm Slice Interval: 2 mm IR: SAFIRE 1<br>Recon 5 - Kernel: I70f, Plane: Axial MIP, Slice Thickness: 8 mm Slice Interval: 4 mm IR: SAFIRE 1                                     |
| GE LightSpeed VCT 64 Slices (GE Healthcare)                                                                                                        | Unenhanced Scan<br>Scan: Helical<br>kV: 120kV<br>Auto mA: 200 - 300 mA Range<br>Ref Noise Index: 11.57<br>Detector Configuration: 64 x 0.625 mm<br>Pitch Factor: 1.375<br>Rotation Time: 0.6 sec                                     | Recon 1 - Algorithm: Standard Plus, Plane: Axial, Slice Thickness: 5 mm Slice Interval: 5 mm IR: No<br>Recon 2 - Algorithm: Lung, Full, Plane: Axial, Slice Thickness: 2.5 mm Slice Interval: 2.5 mm IR: No<br>Recon 3 - Algorithm: Standard, Plus, Plane: Axial, Slice Thickness: 0.625 mm Slice Interval: 0.625 mm IR: No<br>Recon 4 - Algorithm: Lung, Plus, Plane: Axial MIP, Slice Thickness: 8 mm Slice Interval: 4 mm IR: No<br>Recon 5 - Algorithm: Standard Plus, Plane: Sagittal, Slice Thickness: 4 mm Slice Interval: 4 mm IR: No  |

**Table E1(cont'd).** Summary of CT scanners, image acquisition and reconstruction techniques used for assessment of CT Honeycombing

| CT machine                                                                 | Image Acquisition                                                                                                                                                      | Reconstruction protocols                                                                                                                                                                                                                                                                                                                                                                                                                                                                                                  |
|----------------------------------------------------------------------------|------------------------------------------------------------------------------------------------------------------------------------------------------------------------|---------------------------------------------------------------------------------------------------------------------------------------------------------------------------------------------------------------------------------------------------------------------------------------------------------------------------------------------------------------------------------------------------------------------------------------------------------------------------------------------------------------------------|
| <b>Highland Park Hospital</b>                                              |                                                                                                                                                                        |                                                                                                                                                                                                                                                                                                                                                                                                                                                                                                                           |
| SIEMENS Somatom<br>Sensation 64 Slices<br>(Siemens Healthcare<br>GmbH)     | Unenhanced Scan<br>Scan: Spiral<br>kV: 120kV<br>CAREdose4D: 240 Qual Ref mAs<br>Detector Configuration: 64 x 0.6 mm<br>Pitch Factor: 0.7<br>Rotation Time: 0.5 sec     | Recon 1 - Kernel: B31f, Plane: Axial, Slice Thickness: 5 mm Slice<br>Interval: 5 mm IR: NA<br>Recon 2 - Kernel: B31f, Plane: Coronal, Slice Thickness: 3 mm<br>Slice Interval: 3 mm IR: NA<br>Recon 3 - Kernel: B31f, Plane: Sagittal, Slice Thickness: 3 mm<br>Slice Interval: 3 mm IR: NA<br>Recon 4 - Kernel: B80f, Plane: Axial, Slice Thickness: 3 mm Slice<br>Interval: 3 mm IR: NA<br>Recon 5 - Kernel: B80f, Plane: Axial MIP Slice Thickness:8 mm<br>Slice Interval: 4 mm IR: NA                                 |
| <b>Skokie Hospital</b>                                                     |                                                                                                                                                                        |                                                                                                                                                                                                                                                                                                                                                                                                                                                                                                                           |
| SIEMENS Somatom<br>Definition AS 64 Slices<br>(Siemens Healthcare<br>GmbH) | Unenhanced Scan<br>Scan: Spiral<br>CAREKV: 120kV<br>CAREdose4D: 150 Qual Ref mAs<br>Detector Configuration: 64 x 0.6 mm<br>Pitch Factor: 0.8<br>Rotation Time: 0.5 sec | Recon 1 - Kernel: I41f, Plane: Axial, Slice Thickness: 5 mm Slice<br>Interval: 5 mm IR: SAFIRE 1<br>Recon 2 - Kernel: I41f, Plane: Coronal, Slice Thickness: 4 mm<br>Slice Interval: 4 mm IR: SAFIRE 1<br>Recon 3 - Kernel: I41f, Plane: Sagittal, Slice Thickness: 4 mm Slice<br>Interval: 4 mm IR: SAFIRE 1<br>Recon 4 - Kernel: I70f, Plane: Axial, Slice Thickness: 2 mm Slice<br>Interval: 2 mm IR: SAFIRE 1<br>Recon 5 - Kernel: I70f, Plane: Axial MIP, Slice Thickness: 8 mm<br>Slice Interval: 4 mm IR: SAFIRE 1 |

**Table E2.** Baseline Characteristics of Study Population at Tertiary and Non-Tertiary Medical Centers Stratified by CT Honeycombing depicting *P*-values for Subgroup Comparisons

| Characteristics                       | Tertiary Center (n=852)        |                                 |                 | Non-tertiary Centers (n=478)   |                                 |                 |
|---------------------------------------|--------------------------------|---------------------------------|-----------------|--------------------------------|---------------------------------|-----------------|
|                                       | CT Honeycombing Absent (n=517) | CT Honeycombing Present (n=335) | <i>P</i> -value | CT Honeycombing Absent (n=321) | CT Honeycombing Present (n=157) | <i>P</i> -value |
| Age, years                            | 62.8 (12.8)                    | 65.8 (11.5)                     | <0.001          | 71.5 (12.2)                    | 73.0 (10.9)                     | 0.21            |
| Male                                  | 249 (48.2)                     | 192 (57.3)                      | 0.009           | 141 (43.9)                     | 78 (49.7)                       | 0.24            |
| <i>Race/Ethnicity</i>                 |                                |                                 |                 |                                |                                 |                 |
| White                                 | 382 (73.9)                     | 241 (71.9)                      | 0.53            | 254 (79.1)                     | 132 (84.1)                      | 0.20            |
| Black                                 | 89 (17.2)                      | 60 (17.9)                       | 0.79            | 21 (6.5)                       | 5 (3.2)                         | 0.13            |
| Hispanic                              | 30 (5.8)                       | 25 (7.5)                        | 0.36            | 7 (2.2)                        | 2 (1.3)                         | 0.49            |
| Asian                                 | 16 (3.1)                       | 9 (2.7)                         | 0.73            | 24 (7.5)                       | 11 (7.0)                        | 0.85            |
| Ever Smoker                           | 285 (55.1)                     | 218 (65.1)                      | 0.004           | 44 (13.7)                      | 27 (17.2)                       | 0.31            |
| Body mass index, kg.m <sup>2</sup>    | 30.7 (6.9)                     | 28.8 (6.1)                      | <0.001          | 28.5 (6.7)                     | 27.2 (4.6)                      | 0.02            |
| <i>Clinical features</i>              |                                |                                 |                 |                                |                                 |                 |
| Crackles                              | 408 (80.6)                     | 287 (86.2)                      | 0.04            | 111 (64.9)                     | 65 (75.6)                       | 0.08            |
| Clubbing                              | 53 (10.3)                      | 72 (21.5)                       | <0.001          | 21 (6.6)                       | 15 (9.6)                        | 0.25            |
| <i>Lung Function</i>                  |                                |                                 |                 |                                |                                 |                 |
| FVC (% predicted)                     | 67.2 (19.4)                    | 62.2 (17.2)                     | <0.001          | 71.6 (19.0)                    | 74.0 (19.5)                     | 0.20            |
| DL <sub>CO</sub> (% predicted)        | 55.1 (22.7)                    | 45.8 (19.3)                     | <0.001          | 47.3 (19.0)                    | 46.9 (20.5)                     | 0.82            |
| Oxygen therapy                        | 133 (25.7)                     | 132 (39.4)                      | <0.001          | 95 (29.7)                      | 40 (25.5)                       | 0.34            |
| Immunosuppressive therapy             | 183 (36.5)                     | 163 (50.5)                      | <0.001          | 226 (70.4)                     | 96 (61.2)                       | 0.04            |
| <i>HRCT fibrosis</i>                  |                                |                                 |                 |                                |                                 |                 |
| Reticulation                          | 392 (75.8)                     | 256 (76.4)                      | 0.84            | 140 (43.6)                     | 72 (45.9)                       | 0.64            |
| Traction bronchiectasis               | 73 (14.1)                      | 166 (49.6)                      | <0.001          | 84 (26.2)                      | 76 (48.4)                       | <0.001          |
| Antifibrotic therapy                  | 29 (5.6)                       | 12 (3.6)                        | 0.18            | 34 (10.6)                      | 26 (16.7)                       | 0.06            |
| Time from CT to ILD diagnosis, months | 6.2 (21.7)                     | 5.4 (22.7)                      | 0.62            | 0.7 (24.6)                     | 3.3 (25.7)                      | 0.29            |
| <i>ILD sub-category</i>               |                                |                                 |                 |                                |                                 |                 |
| Idiopathic pulmonary fibrosis         | 213 (41.2)                     | 128 (38.2)                      | 0.38            | 186 (57.9)                     | 112 (71.3)                      | 0.005           |
| Connective tissue disease -ILD        | 148 (28.6)                     | 104 (31.0)                      | 0.45            | 6 (1.9)                        | 7 (4.5)                         | 0.10            |
| Unclassifiable/Others                 | 80 (15.5)                      | 45 (13.4)                       | 0.41            | 122 (38.0)                     | 36 (22.9)                       | 0.001           |
| Chronic hypersensitivity pneumonitis  | 76 (14.7)                      | 58 (17.3)                       | 0.001           | 7 (2.2)                        | 2 (1.3)                         | 0.49            |

Total sample size, n=1,330. \*Categorical variables presented as n (%); continuous variables presented as means (SD). Exception for participants; Body mass index, n=1247; crackles, n=1096; clubbing, n=1329; FVC=forced vital capacity, n=1265; DL<sub>CO</sub> = diffusing capacity of the lungs, n=1191; immunosuppressive therapy, n=1302. ILD=interstitial lung disease; IPF=idiopathic pulmonary fibrosis, n=639; CTD-ILD=connective tissue disease associated-ILD, n=265; CHP=chronic hypersensitivity pneumonitis, n=143; Unclassifiable/Other ILD, n=283.

**Table E3.** Agreement between Original Documentation and Imaging Re-read of CT Honeycombing

| <b>Variable measured</b> | <b>Agreement</b> | <b>Expected Agreement</b> | <b>Kappa (95% CI)</b> | <b>Std. Error</b> | <b>P - Value</b> |
|--------------------------|------------------|---------------------------|-----------------------|-------------------|------------------|
| CT Honeycombing present  | 68.1%            | 50.2%                     | 0.36<br>(0.26 – 0.46) | 0.0523            | <0.001           |

*Inter-observer agreement calculated using kappa statistics in subset of participants with imaging re-read scored for CT honeycombing. Imaging re-read was performed only in CTs from study participants at the tertiary center. On original documentation, CT honeycombing n=154 (107 confirmed, 47 refuted), no CT honeycombing n=207 (139 confirmed, 68 refuted); On imaging re-read, CT honeycombing n=175 (107 confirmed, 68 refuted), no CT honeycombing n=186 (139 confirmed, 47 refuted). Abbreviations: CT=computerized tomography; Std=standard.*

**Table E4.** Association between CT Honeycombing and Mortality with Multiple Imputation for Missing Data

| <b>ILD Category</b>         | <b>Adjusted Mortality Hazard*</b> |                |
|-----------------------------|-----------------------------------|----------------|
|                             | <b>HR (95% CI)</b>                | <b>P-value</b> |
| All ILD (n=1330)            | 1.58 (1.26 - 1.97)                | <0.001         |
| <i>ILD Subtype</i>          |                                   |                |
| IPF                         | 1.03 (0.75 - 1.40)                | 0.87           |
| CHP                         | 1.90 (0.89 - 4.08)                | 0.10           |
| CTD-ILD                     | 2.74 (1.48 - 5.05)                | 0.001          |
| Unclassifiable <sup>+</sup> | 1.88 (1.16 - 3.05)                | 0.01           |

*Multiple imputation for missing data (n=88) performed iteratively by using chained equations. ILD=interstitial lung disease; IPF=idiopathic pulmonary fibrosis, n=639; CTD-ILD=connective tissue disease associated-ILD, n=265; CHP=chronic hypersensitivity pneumonitis, n=143; <sup>+</sup>subgroup includes unclassifiable ILD, n=192, and other ILD, n=91; Adjusted=adjusted for hospital center, gender, age, forced vital capacity, diffusing capacity of the lungs for carbon monoxide, and immunosuppressive therapy; \*computed using Cox proportional hazard models.*

**Table E5.** Mortality Hazard in ILD with CT Honeycombing (n=1,330)

| <b>Models evaluated</b>                                               | <b>Adjusted Mortality Hazard</b> |                |
|-----------------------------------------------------------------------|----------------------------------|----------------|
|                                                                       | <b>HR (95% CI)</b>               | <b>P-value</b> |
| CT-Honeycombing                                                       | 1.62 (1.29-2.02)                 | <0.001         |
| CT-Honeycombing adjusted for reticulation only                        | 1.55 (1.24-1.95)                 | <0.001         |
| CT-Honeycombing adjusted for traction bronchiectasis only             | 1.58 (1.24-2.02)                 | <0.001         |
| CT-Honeycombing adjusted for reticulation and traction bronchiectasis | 1.60 (1.25-2.04)                 | <0.001         |

*ILD=interstitial lung disease; Adjusted=adjusted for hospital center, gender, age, forced vital capacity, diffusing capacity of the lungs for carbon monoxide, and immunosuppressive therapy*

**Table E6.** Association between CT Honeycombing and Mortality in ILD cohort with imaging re-read (n=361)

| Characteristics                                        | CT Honeycombing Present | CT Honeycombing Absent | P-value |
|--------------------------------------------------------|-------------------------|------------------------|---------|
| Participants                                           | n=175                   | n=186                  |         |
| Mean survival time, months (95% CI)                    | 62 (52-72)              | 110 (94-126)           | <0.001  |
| Mortality, n (%)                                       | 74 (42.3)               | 43 (23.1)              | <0.001  |
| Absolute mortality rate (events per person-year)       | 0.15                    | 0.07                   | <0.001  |
| Hazard ratio (unadjusted, 95% CI)                      | 2.21 (1.51-3.23)        | -                      | <0.001  |
| Hazard ratio (adjusted <sup>+</sup> , 95% CI)          | 1.44 (0.97-2.14)        | -                      | 0.07    |
| Extent of CT Honeycombing (% involvement) <sup>*</sup> |                         |                        |         |
| Hazard ratio (unadjusted)                              | 1.50 (1.25-1.80)        | -                      | <0.001  |
| Hazard ratio (adjusted <sup>+</sup> )                  | 1.40 (1.13-1.74)        | -                      | 0.002   |
| Lung transplantation, n (%)                            | 12 (6.9)                | 11 (5.9)               | 0.71    |

*Hazard ratios computed using Cox proportional hazard models; <sup>+</sup>adjusted=adjusted for hospital center, gender, age, forced vital capacity, diffusing capacity of the lungs, ILD subtype, and immunosuppressive therapy. Imaging re-read was performed only in CTs from study participants at the tertiary center. <sup>\*</sup>Percent involvement of CT Honeycombing scored incrementally with 5% intervals; ILD=interstitial lung disease. Distribution of ILD subtypes, IPF=idiopathic pulmonary fibrosis, n=234; CTD-ILD=connective tissue disease associated-ILD, n=5; Unclassifiable ILD, n=4, CHP=chronic hypersensitivity pneumonitis, n=118.*



**Table E7.** \*Diagnostic confidence of UIP stratified by CT Honeycombing in cohort# with imaging re-read (n=361)

| Characteristics              | CT<br>Honeycombing<br>Present<br>n=175 | CT<br>Honeycombing<br>Absent<br>n=186 |
|------------------------------|----------------------------------------|---------------------------------------|
| UIP, n (%)                   | 75 (62.0)                              | 56 (35.9)                             |
| Probable UIP, n (%)          | 7 (5.8)                                | 32 (20.5)                             |
| Indeterminate, n (%)         | 4 (3.3)                                | 3 (1.92)                              |
| Alternative diagnosis, n (%) | 35 (28.9)                              | 65 (41.7)                             |

\*Diagnostic confidence per ATS 2018 guidelines (*Am J Respir Crit Care Med.* 2018 Sep 1;198(5):e44-e68). #Baseline CT scan images from 84 subjects could not be optimally re-scored for UIP diagnostic confidence. Patients designated as Probable UIP were categorized previously as possible UIP. Distribution of ILD subtypes, IPF=idiopathic pulmonary fibrosis, n=234; CTD-ILD=connective tissue disease associated-ILD, n=5; Unclassifiable ILD, n=4, CHP=chronic hypersensitivity pneumonitis, n=118.

**Table E8.** Radiologist scoresheets with scores for dichotomous presence/absence of honeycombing and extent in cohort with imaging re-read (n=361)

| CT chest Re-read |              |        |              | Original CT Report |              |        |              |
|------------------|--------------|--------|--------------|--------------------|--------------|--------|--------------|
| Subject          | Honeycombing | Extent | Honeycombing | Subject            | Honeycombing | Extent | Honeycombing |
| Subj001          | Absent       | < 5%   | Absent       | Subj061            | Absent       | N/A    | Present      |
| Subj002          | Present      | < 5%   | Absent       | Subj062            | Absent       | N/A    | Present      |
| Subj003          | Absent       | < 5%   | Absent       | Subj063            | Present      | 10%    | Present      |
| Subj004          | Absent       | < 5%   | Absent       | Subj064            | Present      | < 5%   | Present      |
| Subj005          | Absent       | < 5%   | Absent       | Subj065            | Present      | < 5%   | Present      |
| Subj006          | Present      | < 5%   | Present      | Subj066            | Present      | 5%     | Present      |
| Subj007          | Absent       | < 5%   | Absent       | Subj067            | Present      | < 5%   | Present      |
| Subj008          | Present      | < 5%   | Present      | Subj068            | Present      | 5%     | Present      |
| Subj009          | Absent       | < 5%   | Absent       | Subj069            | Present      | < 5%   | Present      |
| Subj010          | Absent       | < 5%   | Absent       | Subj070            | Present      | 15%    | Present      |
| Subj011          | Absent       | < 5%   | Absent       | Subj071            | Absent       | N/A    | Absent       |
| Subj012          | Absent       | < 5%   | Absent       | Subj072            | Present      | 5%     | Present      |
| Subj013          | Absent       | < 5%   | Absent       | Subj073            | Absent       | N/A    | Present      |
| Subj014          | Absent       | < 5%   | Present      | Subj074            | Absent       | N/A    | Present      |
| Subj015          | Absent       | N/A    | Present      | Subj075            | Absent       | N/A    | Present      |
| Subj016          | Absent       | N/A    | Present      | Subj076            | Present      | 10%    | Present      |
| Subj017          | Absent       | < 5%   | Present      | Subj077            | Absent       | N/A    | Present      |
| Subj018          | Absent       | N/A    | Absent       | Subj078            | Present      | < 5%   | Present      |
| Subj019          | Absent       | < 5%   | Absent       | Subj079            | Absent       | N/A    | Present      |
| Subj020          | Absent       | < 5%   | Present      | Subj080            | Present      | 5%     | Present      |
| Subj021          | Absent       | N/A    | Absent       | Subj081            | Present      | < 5%   | Present      |
| Subj022          | Absent       | < 5%   | Absent       | Subj082            | Absent       | < 5%   | Present      |
| Subj023          | Absent       | N/A    | Present      | Subj083            | Present      | < 5%   | Present      |
| Subj024          | Absent       | N/A    | Present      | Subj084            | Present      | 5%     | Present      |
| Subj025          | Absent       | N/A    | Present      | Subj085            | Absent       | N/A    | Present      |
| Subj026          | Absent       | < 5%   | Absent       | Subj086            | Present      | < 5%   | Present      |
| Subj027          | Absent       | N/A    | Absent       | Subj087            | Present      | < 5%   | Present      |
| Subj028          | Present      | 10%    | Present      | Subj088            | Present      | < 5%   | Present      |
| Subj029          | Present      | 5%     | Present      | Subj089            | Absent       | N/A    | Present      |
| Subj030          | Present      | < 5%   | Present      | Subj090            | Present      | < 5%   | Present      |
| Subj031          | Present      | 10%    | Present      | Subj091            | Present      | < 5%   | Present      |
| Subj032          | Present      | < 5%   | Present      | Subj092            | Present      | 5%     | Present      |
| Subj033          | Present      | 20%    | Present      | Subj093            | Absent       | N/A    | Present      |
| Subj034          | Present      | < 5%   | Present      | Subj094            | Present      | 5%     | Present      |
| Subj035          | Absent       | N/A    | Present      | Subj095            | Present      | 10%    | Present      |
| Subj036          | Present      | 5%     | Present      | Subj096            | Present      | 10%    | Present      |
| Subj037          | Absent       | N/A    | Present      | Subj097            | Absent       | N/A    | Present      |
| Subj038          | Absent       | N/A    | Present      | Subj098            | Present      | 5%     | Present      |
| Subj039          | Present      | 5%     | Present      | Subj099            | Present      | 5%     | Present      |
| Subj040          | Present      | < 5%   | Present      | Subj100            | Present      | 5%     | Present      |
| Subj041          | Present      | 5%     | Present      | Subj101            | Absent       | N/A    | Present      |
| Subj042          | Present      | < 5%   | Present      | Subj102            | Absent       | N/A    | Present      |
| Subj043          | Present      | < 5%   | Present      | Subj103            | Present      | 10%    | Present      |
| Subj044          | Absent       | N/A    | Present      | Subj104            | Present      | 10%    | Present      |
| Subj045          | Present      | 5%     | Present      | Subj105            | Absent       | N/A    | Present      |
| Subj046          | Present      | < 5%   | Present      | Subj106            | Absent       | N/A    | Present      |
| Subj047          | Absent       | N/A    | Present      | Subj107            | Absent       | N/A    | Present      |
| Subj048          | Present      | 15%    | Present      | Subj108            | Present      | < 5%   | Present      |
| Subj049          | Present      | 5%     | Present      | Subj109            | Present      | < 5%   | Present      |
| Subj050          | Present      | 5%     | Present      | Subj110            | Present      | 10%    | Present      |
| Subj051          | Present      | N/A    | Present      | Subj111            | Absent       | N/A    | Present      |
| Subj052          | Absent       | N/A    | Present      | Subj112            | Present      | 10%    | Present      |
| Subj053          | Present      | < 5%   | Present      | Subj113            | Absent       | N/A    | Present      |
| Subj054          | Absent       | N/A    | Present      | Subj114            | Absent       | N/A    | Present      |
| Subj055          | Present      | 5%     | Present      | Subj115            | Absent       | N/A    | Present      |
| Subj056          | Present      | < 5%   | Present      | Subj116            | Present      | 5%     | Present      |
| Subj057          | Present      | 15%    | Present      | Subj117            | Present      | 5%     | Present      |
| Subj058          | Present      | 5%     | Present      | Subj118            | Present      | < 5%   | Present      |
| Subj059          | Absent       | N/A    | Present      | Subj119            | Present      | < 5%   | Present      |
| Subj060          | Present      | < 5%   | Present      | Subj120            | Present      | < 5%   | Present      |

**Table E8.** (contd') Radiologist scoresheets with scores for dichotomous presence/absence of honeycombing and extent in cohort with imaging re-read (n=361)

| CT chest Re-read |              |        |              | Original CT Report |              |        |              |
|------------------|--------------|--------|--------------|--------------------|--------------|--------|--------------|
| Subject          | Honeycombing | Extent | Honeycombing | Subject            | Honeycombing | Extent | Honeycombing |
| Subj121          | Present      | < 5%   | Present      | Subj181            | Absent       | N/A    | Absent       |
| Subj122          | Present      | 5%     | Absent       | Subj182            | Present      | < 5%   | Absent       |
| Subj123          | Absent       | < 5%   | Absent       | Subj183            | Absent       | < 5%   | Absent       |
| Subj124          | Present      | < 5%   | Absent       | Subj184            | Present      | < 5%   | Absent       |
| Subj125          | Present      | < 5%   | Absent       | Subj185            | Absent       | N/A    | Absent       |
| Subj126          | Absent       | N/A    | Absent       | Subj186            | Absent       | N/A    | Absent       |
| Subj127          | Present      | 5%     | Absent       | Subj187            | Absent       | N/A    | Absent       |
| Subj128          | Present      | 5%     | Absent       | Subj188            | Absent       | N/A    | Absent       |
| Subj129          | Absent       | < 5%   | Absent       | Subj189            | Absent       | < 5%   | Absent       |
| Subj130          | Absent       | N/A    | Absent       | Subj190            | Absent       | N/A    | Absent       |
| Subj131          | Absent       | N/A    | Absent       | Subj191            | Absent       | < 5%   | Absent       |
| Subj132          | Absent       | N/A    | Absent       | Subj192            | Present      | < 5%   | Absent       |
| Subj133          | Absent       | N/A    | Absent       | Subj193            | Present      | < 5%   | Absent       |
| Subj134          | Present      | < 5%   | Absent       | Subj194            | Present      | 5%     | Absent       |
| Subj135          | Present      | 5%     | Absent       | Subj195            | Present      | < 5%   | Absent       |
| Subj136          | Present      | 5%     | Absent       | Subj196            | Present      | 5%     | Absent       |
| Subj137          | Absent       | < 5%   | Absent       | Subj197            | Present      | < 5%   | Absent       |
| Subj138          | Absent       | N/A    | Absent       | Subj198            | Present      | < 5%   | Absent       |
| Subj139          | Present      | 15%    | Absent       | Subj199            | Present      | 5%     | Absent       |
| Subj140          | Present      | 5%     | Absent       | Subj200            | Present      | < 5%   | Absent       |
| Subj141          | Absent       | N/A    | Absent       | Subj201            | Absent       | < 5%   | Absent       |
| Subj142          | Absent       | N/A    | Absent       | Subj202            | Absent       | N/A    | Absent       |
| Subj143          | Absent       | N/A    | Absent       | Subj203            | Present      | < 5%   | Absent       |
| Subj144          | Absent       | < 5%   | Absent       | Subj204            | Absent       | N/A    | Absent       |
| Subj145          | Absent       | < 5%   | Absent       | Subj205            | Present      | < 5%   | Absent       |
| Subj146          | Absent       | N/A    | Absent       | Subj206            | Absent       | N/A    | Absent       |
| Subj147          | Present      | < 5%   | Absent       | Subj207            | Absent       | < 5%   | Absent       |
| Subj148          | Present      | < 5%   | Absent       | Subj208            | Absent       | < 5%   | Absent       |
| Subj149          | Present      | < 5%   | Absent       | Subj209            | Absent       | < 5%   | Absent       |
| Subj150          | Present      | 5%     | Absent       | Subj210            | Absent       | N/A    | Absent       |
| Subj151          | Present      | 5%     | Absent       | Subj211            | Present      | 5%     | Absent       |
| Subj152          | Present      | 5%     | Absent       | Subj212            | Absent       | N/A    | Absent       |
| Subj153          | Present      | < 5%   | Absent       | Subj213            | Present      | 5%     | Absent       |
| Subj154          | Present      | < 5%   | Absent       | Subj214            | Absent       | N/A    | Absent       |
| Subj155          | Present      | < 5%   | Absent       | Subj215            | Present      | 10%    | Absent       |
| Subj156          | Present      | < 5%   | Absent       | Subj216            | Absent       | < 5%   | Absent       |
| Subj157          | Absent       | N/A    | Absent       | Subj217            | Present      | < 5%   | Absent       |
| Subj158          | Absent       | N/A    | Absent       | Subj218            | Present      | 10%    | Absent       |
| Subj159          | Present      | 15%    | Absent       | Subj219            | Present      | 5%     | Absent       |
| Subj160          | Absent       | < 5%   | Absent       | Subj220            | Present      | 5%     | Absent       |
| Subj161          | Absent       | N/A    | Absent       | Subj221            | Present      | 5%     | Absent       |
| Subj162          | Present      | < 5%   | Absent       | Subj222            | Present      | < 5%   | Absent       |
| Subj163          | Absent       | N/A    | Absent       | Subj223            | Present      | 5%     | Absent       |
| Subj164          | Absent       | < 5%   | Absent       | Subj224            | Absent       | < 5%   | Absent       |
| Subj165          | Absent       | N/A    | Absent       | Subj225            | Present      | < 5%   | Absent       |
| Subj166          | Present      | < 5%   | Absent       | Subj226            | Present      | 10%    | Absent       |
| Subj167          | Absent       | N/A    | Absent       | Subj227            | Present      | < 5%   | Absent       |
| Subj168          | Present      | < 5%   | Absent       | Subj228            | Absent       | N/A    | Absent       |
| Subj169          | Absent       | < 5%   | Absent       | Subj229            | Present      | < 5%   | Absent       |
| Subj170          | Present      | < 5%   | Absent       | Subj230            | Present      | 5%     | Absent       |
| Subj171          | Absent       | N/A    | Absent       | Subj231            | Absent       | N/A    | Absent       |
| Subj172          | Absent       | < 5%   | Absent       | Subj232            | Absent       | N/A    | Absent       |
| Subj173          | Absent       | N/A    | Absent       | Subj233            | Present      | < 5%   | Absent       |
| Subj174          | Absent       | N/A    | Absent       | Subj234            | Absent       | N/A    | Absent       |
| Subj175          | Absent       | < 5%   | Absent       | Subj235            | Absent       | N/A    | Absent       |
| Subj176          | Present      | 5%     | Absent       | Subj236            | Absent       | N/A    | Absent       |
| Subj177          | Absent       | N/A    | Absent       | Subj237            | Present      | 5%     | Absent       |
| Subj178          | Absent       | N/A    | Absent       | Subj238            | Absent       | N/A    | Absent       |
| Subj179          | Absent       | N/A    | Absent       | Subj239            | Absent       | N/A    | Absent       |
| Subj180          | Absent       | N/A    | Absent       | Subj240            | Absent       | N/A    | Absent       |

**Table E8.** (contd') Radiologist scoresheets with scores for dichotomous presence/absence of honeycombing and extent in cohort with imaging re-read (n=361)

| CT chest Re-read |              | Original CT Report |              | CT chest Re-read |              | Original CT Report |              |
|------------------|--------------|--------------------|--------------|------------------|--------------|--------------------|--------------|
| Subject          | Honeycombing | Extent             | Honeycombing | Subject          | Honeycombing | Extent             | Honeycombing |
| Subj241          | Absent       | < 5%               | Absent       | Subj302          | Present      | 5%                 | Present      |
| Subj242          | Absent       | < 5%               | Absent       | Subj303          | Absent       | < 5%               | Absent       |
| Subj243          | Present      | 5%                 | Present      | Subj304          | Present      | 5%                 | Absent       |
| Subj244          | Absent       | < 5%               | Absent       | Subj305          | Absent       | < 5%               | Absent       |
| Subj245          | Absent       | < 5%               | Absent       | Subj306          | Present      | < 5%               | Present      |
| Subj246          | Present      | < 5%               | Present      | Subj307          | Absent       | < 5%               | Present      |
| Subj247          | Present      | < 5%               | Present      | Subj308          | Present      | 5%                 | Absent       |
| Subj248          | Absent       | < 5%               | Absent       | Subj309          | Absent       | < 5%               | Absent       |
| Subj249          | Present      | 5%                 | Present      | Subj310          | Present      | < 5%               | Present      |
| Subj250          | Present      | < 5%               | Absent       | Subj311          | Absent       | N/A                | Absent       |
| Subj251          | Present      | 5%                 | Present      | Subj312          | Absent       | < 5%               | Absent       |
| Subj252          | Absent       | < 5%               | Present      | Subj313          | Absent       | < 5%               | Absent       |
| Subj253          | Present      | 10%                | Present      | Subj314          | Absent       | < 5%               | Absent       |
| Subj254          | Present      | < 5%               | Absent       | Subj315          | Present      | 5%                 | Present      |
| Subj255          | Present      | 5%                 | Present      | Subj316          | Absent       | < 5%               | Present      |
| Subj256          | Present      | 5%                 | Present      | Subj317          | Present      | 5%                 | Present      |
| Subj257          | Present      | < 5%               | Present      | Subj318          | Present      | < 5%               | Present      |
| Subj258          | Present      | < 5%               | Present      | Subj319          | Absent       | < 5%               | Absent       |
| Subj259          | Absent       | < 5%               | Absent       | Subj320          | Present      | 5%                 | Absent       |
| Subj260          | Present      | 5%                 | Present      | Subj321          | Absent       | < 5%               | Absent       |
| Subj261          | Absent       | < 5%               | Absent       | Subj322          | Absent       | < 5%               | Absent       |
| Subj262          | Present      | 10%                | Present      | Subj323          | Absent       | < 5%               | Present      |
| Subj263          | Present      | 10%                | Present      | Subj324          | Absent       | < 5%               | Absent       |
| Subj264          | Present      | 5%                 | Present      | Subj325          | Absent       | < 5%               | Absent       |
| Subj265          | Absent       | < 5%               | Absent       | Subj326          | Absent       | < 5%               | Absent       |
| Subj266          | Absent       | < 5%               | Absent       | Subj327          | Absent       | < 5%               | Absent       |
| Subj267          | Present      | < 5%               | Present      | Subj328          | Absent       | < 5%               | Absent       |
| Subj268          | Present      | 5%                 | Present      | Subj329          | Present      | 5%                 | Present      |
| Subj269          | Absent       | < 5%               | Absent       | Subj330          | Absent       | < 5%               | Absent       |
| Subj270          | Present      | < 5%               | Absent       | Subj331          | Present      | 5%                 | Present      |
| Subj271          | Absent       | < 5%               | Absent       | Subj332          | Present      | < 5%               | Absent       |
| Subj272          | Absent       | < 5%               | Absent       | Subj333          | Present      | < 5%               | Present      |
| Subj273          | Present      | 5%                 | Present      | Subj334          | Present      | < 5%               | Present      |
| Subj274          | Absent       | < 5%               | Absent       | Subj335          | Absent       | < 5%               | Absent       |
| Subj275          | Present      | 5%                 | Present      | Subj336          | Absent       | < 5%               | Absent       |
| Subj276          | Absent       | < 5%               | Absent       | Subj337          | Absent       | < 5%               | Absent       |
| Subj277          | Present      | 10%                | Present      | Subj338          | Present      | 10%                | Present      |
| Subj278          | Absent       | < 5%               | Absent       | Subj339          | Absent       | < 5%               | Absent       |
| Subj279          | Present      | < 5%               | Absent       | Subj340          | Absent       | < 5%               | Present      |
| Subj280          | Absent       | < 5%               | Present      | Subj341          | Present      | 5%                 | Present      |
| Subj281          | Absent       | < 5%               | Absent       | Subj342          | Present      | < 5%               | Present      |
| Subj282          | Present      | < 5%               | Present      | Subj343          | Absent       | < 5%               | Absent       |
| Subj283          | Absent       | < 5%               | Absent       | Subj344          | Present      | 5%                 | Present      |
| Subj284          | Absent       | < 5%               | Absent       | Subj345          | Absent       | < 5%               | Absent       |
| Subj285          | Absent       | < 5%               | Absent       | Subj346          | Absent       | < 5%               | Absent       |
| Subj286          | Present      | 20%                | Absent       | Subj347          | Absent       | < 5%               | Present      |
| Subj287          | Absent       | < 5%               | Absent       | Subj348          | Present      | 10%                | Present      |
| Subj288          | Absent       | < 5%               | Present      | Subj349          | Absent       | < 5%               | Absent       |
| Subj289          | Present      | 15%                | Present      | Subj350          | Absent       | < 5%               | Absent       |
| Subj290          | Present      | < 5%               | Absent       | Subj351          | Absent       | < 5%               | Absent       |
| Subj291          | Absent       | < 5%               | Absent       | Subj352          | Absent       | < 5%               | Absent       |
| Subj292          | Absent       | < 5%               | Absent       | Subj353          | Absent       | < 5%               | Absent       |
| Subj293          | Absent       | < 5%               | Present      | Subj354          | Absent       | < 5%               | Absent       |
| Subj294          | Absent       | < 5%               | Absent       | Subj355          | Present      | < 5%               | Present      |
| Subj295          | Absent       | < 5%               | Absent       | Subj356          | Absent       | < 5%               | Absent       |
| Subj296          | Absent       | < 5%               | Absent       | Subj357          | Absent       | < 5%               | Absent       |
| Subj297          | Absent       | < 5%               | Absent       | Subj358          | Present      | 5%                 | Present      |
| Subj298          | Present      | < 5%               | Present      | Subj359          | Absent       | < 5%               | Absent       |
| Subj299          | Absent       | < 5%               | Absent       | Subj360          | Present      | < 5%               | Present      |
| Subj300          | Present      | < 5%               | Present      | Subj361          | Present      | 5%                 | Absent       |
| Subj301          | Absent       | < 5%               | Present      |                  |              |                    |              |

**Table E9.** Mortality Hazard in ILD stratified by Tertiary vs. Non-tertiary medical center

| Characteristics                | Tertiary Medical Center<br>(n=852) |         | Non-Tertiary Medical Centers<br>(n=478) |         |
|--------------------------------|------------------------------------|---------|-----------------------------------------|---------|
|                                | HR (95% CI)                        | P-value | HR (95% CI)                             | P-value |
| CT Honeycombing                | 1.85 (1.43-2.38)                   | <0.001  | 1.29 (0.90-1.86)                        | 0.17    |
| CT Honeycombing( <i>adj.</i> ) | 1.49 (1.14-1.94)                   | 0.003   | 1.44 (0.99-2.09)                        | 0.06    |

*adj.*=adjusted for hospital center, gender, age, forced vital capacity, diffusing capacity of the lungs, ILD subtype, and immunosuppressive therapy. ILD=interstitial lung disease

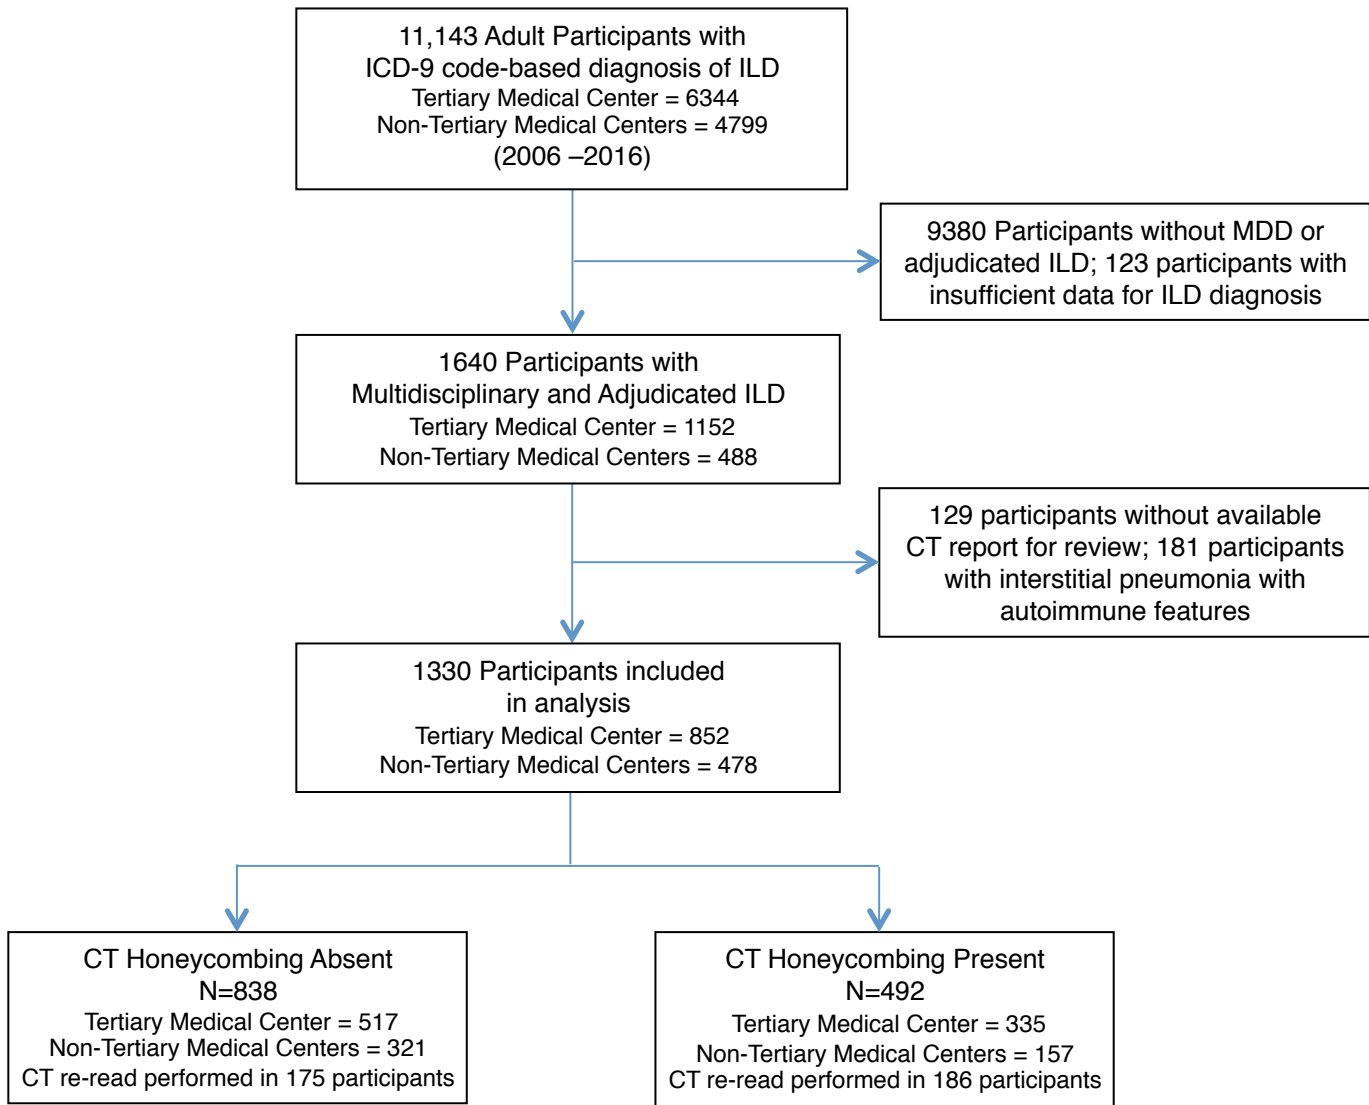

**Figure E1.** STROBE diagram. ILD= interstitial lung disease

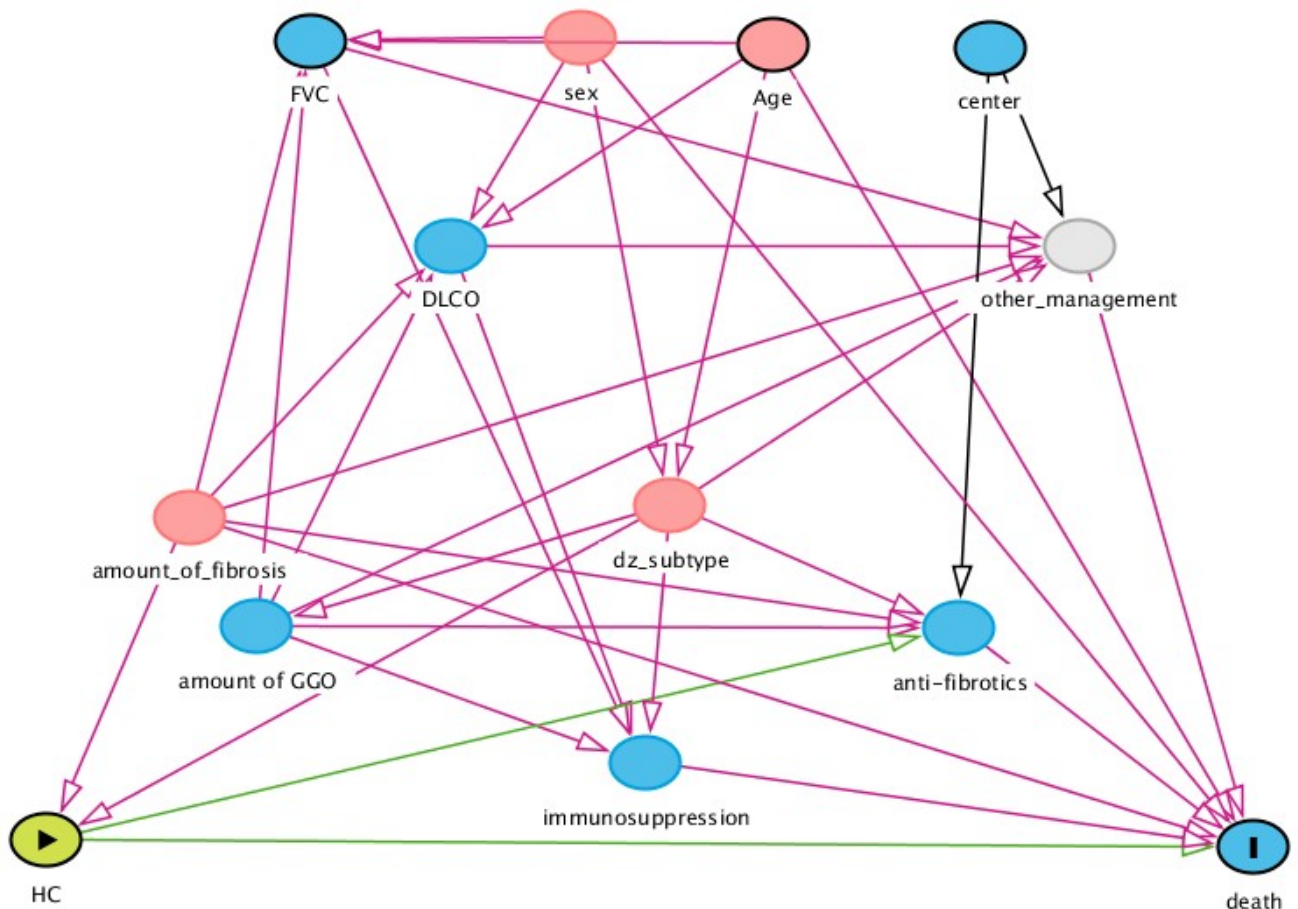

**Figure E2.** Directed Acyclic Graph (DAG) specifying variables considered in analytic models for CT Honeycombing and mortality in ILD. HC=CT honeycombing; FVC=forced vital capacity; DLCO=diffusing capacity of the lungs; dz\_subtype= ILD subtype; amount of fibrosis = composite measure of the extent of fibrosis including reticulation and traction bronchiectasis; GGO=ground glass opacities; ILD= interstitial lung disease
